# Supplementary material for: Influence of long-range forces and capillarity on the function of underwater superoleophobic wrinkled surfaces
Source: Royal Society of Chemistry journal article supplement (doi:10.1039/c8sm00709h), 2018-01-01
Supplement: c8sm00709h1.pdf [file c8sm00709h1.pdf]

## Supporting Information

### **Influence of long-range forces and capillarity on the function of underwater superoleophobic wrinkled surfaces**

Ahmed Owais,<sup>a,b</sup> Truis Smith-Palmer,<sup>c</sup> Angus Gentle,<sup>d</sup> and Chiara Neto<sup>a\*</sup>

<sup>a</sup> School of Chemistry and The University of Sydney Nano Institute, The University of Sydney, NSW 2006 Australia

<sup>b</sup> Renewable Energy Science and Engineering Department, Faculty of Postgraduate Studies for Advanced Sciences (PSAS), Beni-Suef University, Beni-Suef 62511, Egypt

<sup>c</sup> Department of Chemistry, St Francis Xavier University, 2321 Notre Dame Ave, Antigonish, Nova Scotia, B2G 2W5, Canada

<sup>d</sup> School of Mathematical and Physical Science, University of Technology Sydney, Broadway, PO Box 123, NSW 2007, Australia

| P4VP<br>Coating<br>thickness<br>(nm) | Hexadecane           |                       |                      |                       | Sesame oil           |                       |                      |                       |
|--------------------------------------|----------------------|-----------------------|----------------------|-----------------------|----------------------|-----------------------|----------------------|-----------------------|
|                                      | Plasma untreated     |                       | Plasma treated       |                       | Plasma untreated     |                       | Plasma treated       |                       |
|                                      | Contact<br>angle (°) | Roll-off<br>angle (°) |
| 16                                   |                      |                       | 160 ± 8              | 26 ± 18               |                      |                       | 167 ± 4              | 37 ± 26               |
| 36                                   | 169 ± 1              | 18 ± 7                | 167 ± 5              | 2 ± 3                 | 158 ± 8              | 47 ± 13               | 167 ± 5              | 13 ± 18               |
| 241                                  | 164 ± 3              | 6 ± 1                 | 167 ± 2              | 6 ± 3                 | 168 ± 5              | 18 ± 3                | 171 ± 3              | 13 ± 4                |
| P4VP<br>Coating<br>thickness<br>(nm) | Petroleum benzene    |                       |                      |                       | Paraffin oil         |                       |                      |                       |
|                                      | Plasma untreated     |                       | Plasma treated       |                       | Plasma untreated     |                       | Plasma treated       |                       |
|                                      | Contact<br>angle (°) | Roll-off<br>angle (°) |
| 16                                   |                      |                       | 164 ± 13             | 24 ± 20               |                      |                       | 170 ± 2              | 25 ± 19               |
| 36                                   | 162 ± 10             | 28 ± 16               | 164 ± 3              | 5 ± 2                 | 165 ± 11             | 31 ± 18               | 166 ± 5              | 11 ± 3                |
| 241                                  | 160 ± 12             | 8 ± 2                 | 160 ± 4              | 7 ± 4                 | 168 ± 1              | 8 ± 3                 | 166 ± 6              | 11 ± 4                |

**Table S1:** Underwater contact angle and roll-off angle of different oils on the plasma treated and untreated wrinkled P4VP as a function of coating thickness.

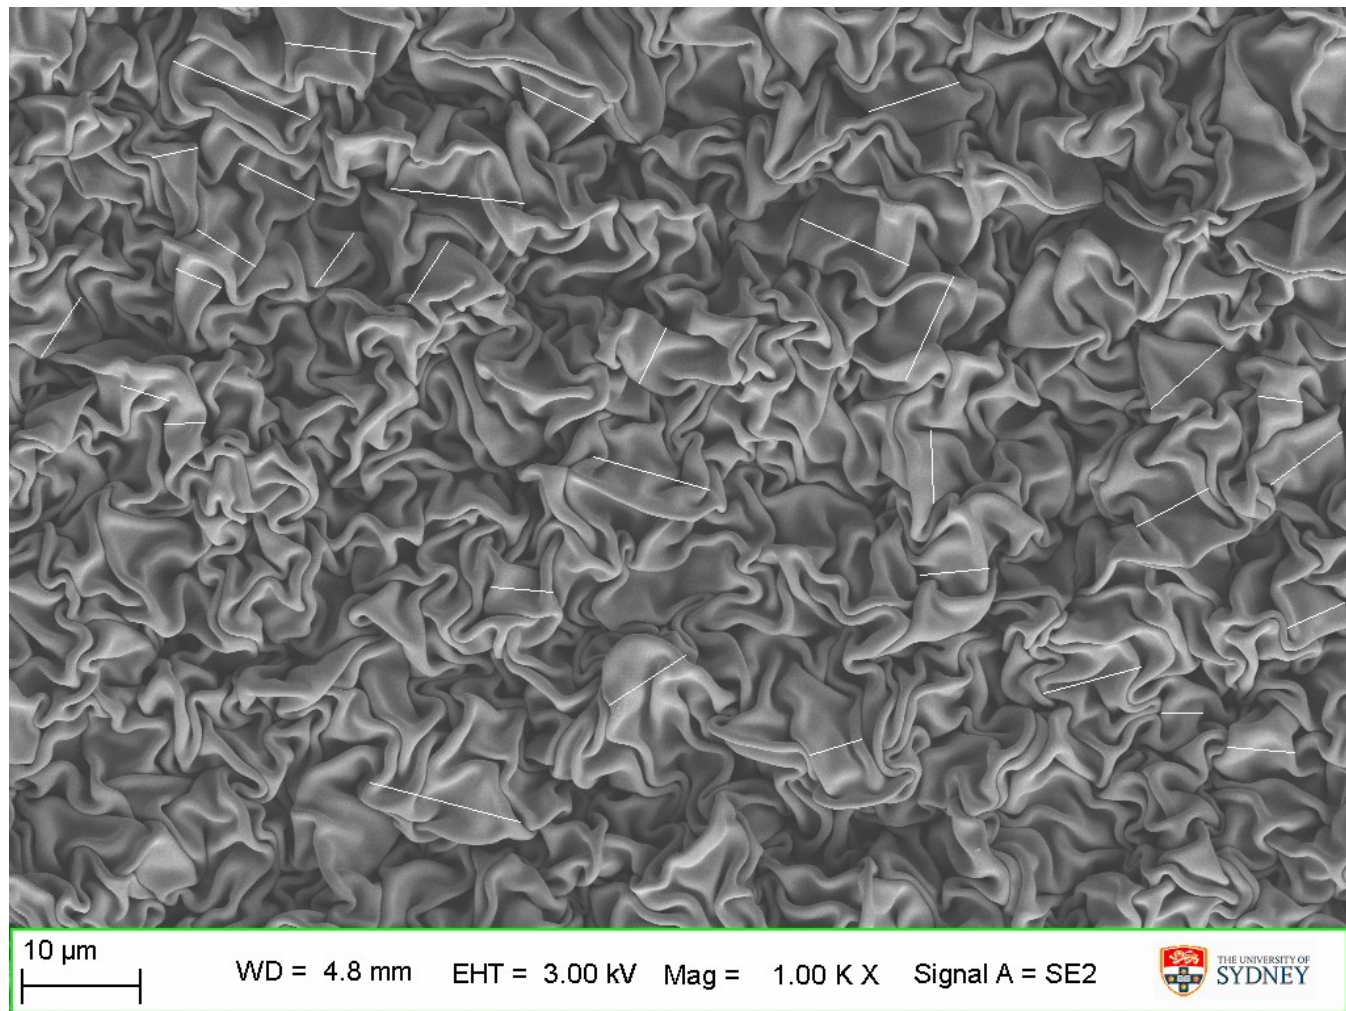

**Fig. S1:** The measurement of the width of folds on the 241 nm-thick wrinkled P4VP surfaces is shown in this SEM micrograph. Measurement taken by Image J.

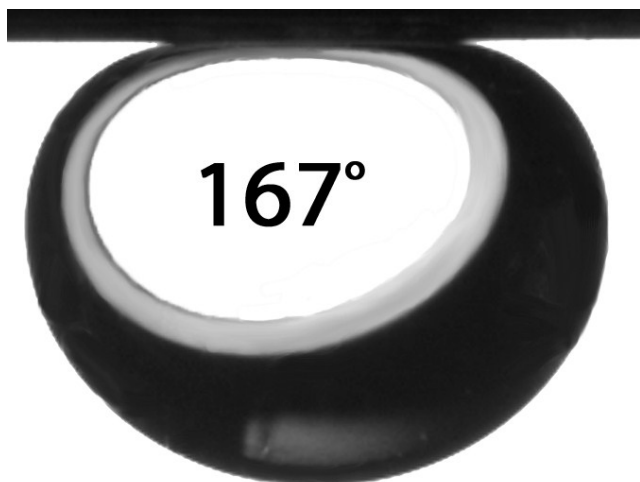

**Fig. S2:** Underwater contact angle of hexadecane on a 22 nm-thick smooth gold film.

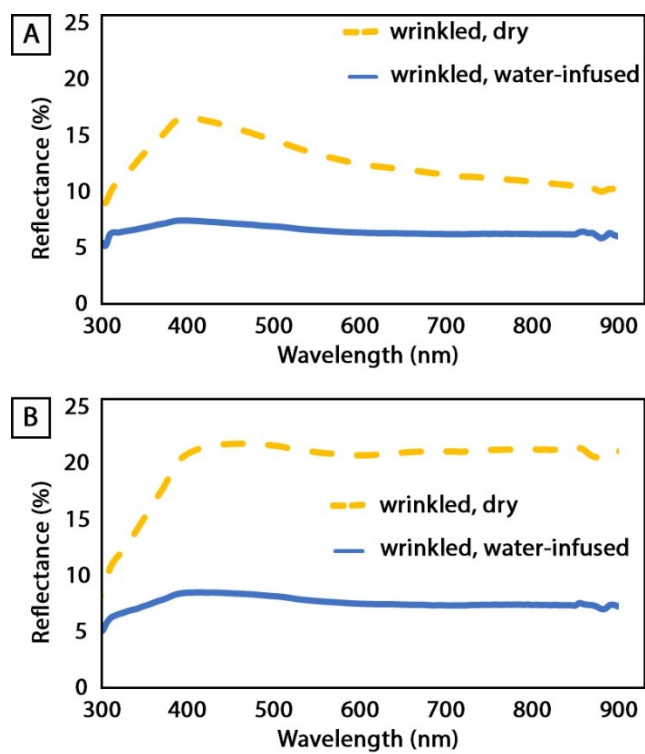

**Fig. S3.** Reflectance of dry and infused wrinkled P4VP films on top of transparent Polyshrink substrates (A) 36 nm-thick P4VP film, and (B) 241 nm-thick P4VP film.
